# Supplementary material for: Hydrophobicity identifies false positives and false negatives in peptide-MHC binding
Source: PubMed Central journal article supplement (PMC9677119; doi:10.3389/fonc.2022.1034810), 2022-11-07
Supplement: DataSheet_1.pdf [file DataSheet_1.pdf]

## Supplementary Material

The changes in predictions observed in Figure 1 suggest that NetMHCpan-4.1 approximated the training scores better than NetMHC-4.0 did in Figure 1 (the yellow plot fitted the S-curve transition of the blue plot more tightly than the red plot did). To confirm this, we calculated the Pearson Correlation of the training data with NetMHC-4.0, and with NetMHCpan-4.1. The correlation coefficients for NetMHC-4.0 and NetMHCpan-4.1 for A2 were 0.8492 and 0.8637 respectively. For B27, these coefficients were 0.8165 and 0.8844. For B8, these were 0.8492 and 0.863. It is likely that the stronger correlation for NetMHCpan-4.1 is a consequence of NetMHCpan-4.1 having “seen” EL peptides which NetMHC-4.0 would not have been trained on.

**Table S1.** Confusion matrices for the training data analysis for NetMHC-4.0 and NetMHCpan-4.1. We counted True Negatives (TN), False Positives (FP), False Negatives (FN), and True Positives (TP).

| HLA | Peptide Case     | NetMHC-4.0 |     |      |      | NetMHCpan-4.1 |     |      |      |
|-----|------------------|------------|-----|------|------|---------------|-----|------|------|
|     |                  | TN         | FP  | FN   | TP   | TN            | FP  | FN   | TP   |
| A2  | All              | 42621      | 770 | 3540 | 5728 | 41166         | 730 | 2630 | 8133 |
|     | Hydrophobic only | 8050       | 516 | 1094 | 3199 | 7467          | 316 | 1345 | 3731 |
|     | Hydrophilic only | 5213       | 3   | 71   | 11   | 5193          | 12  | 36   | 57   |
|     | Balanced only    | 29316      | 250 | 2371 | 2508 | 28464         | 402 | 1247 | 4332 |
| B27 | All              | 14573      | 118 | 1476 | 1255 | 14367         | 221 | 384  | 2450 |
|     | Hydrophobic only | 2581       | 12  | 215  | 247  | 2564          | 15  | 80   | 396  |
|     | Hydrophilic only | 1946       | 24  | 162  | 92   | 1905          | 45  | 51   | 223  |
|     | Balanced only    | 10028      | 82  | 1098 | 914  | 9880          | 161 | 253  | 1828 |
| B8  | All              | 15923      | 169 | 1257 | 2099 | 15495         | 280 | 667  | 3006 |
|     | Hydrophobic only | 2864       | 35  | 265  | 353  | 2785          | 38  | 189  | 505  |
|     | Hydrophilic only | 2101       | 18  | 78   | 209  | 2058          | 32  | 53   | 263  |
|     | Balanced only    | 10950      | 116 | 913  | 1534 | 10645         | 210 | 424  | 2234 |

**Supplementary Material**

**Table S2.** Sizes, Means, and Standard Deviations of the sets of peptides reported in all Violin plots. The abbreviations used here are: all Training Peptides (TP), NetMHC-4.0 predicted Strong Binders (N-4.0 SB), NetMHCpan-4.1 predicted Strong Binders (NP-4.1 SB), and all Sampled Peptides (SP).

| HLA | Value of Set | Training Data Analysis |          |           | Human Proteome Analysis |          |           |
|-----|--------------|------------------------|----------|-----------|-------------------------|----------|-----------|
|     |              | TP                     | N-4.0 SB | NP-4.1 SB | SP                      | N-4.0 SB | NP-4.1 SB |
| A2  | Size         | 52659                  | 6498     | 8863      | 50804                   | 486      | 730       |
|     | Mean         | 0.902                  | 3.458    | 2.756     | 0.052                   | 4.519    | 2.789     |
|     | Std. Dev.    | 3.063                  | 2.365    | 2.426     | 3.212                   | 2.517    | 2.647     |
| B27 | Size         | 17422                  | 1373     | 2671      | 50804                   | 290      | 528       |
|     | Mean         | 0.364                  | 0.725    | 0.450     | 0.052                   | -0.155   | -0.775    |
|     | Std. Dev.    | 2.923                  | 2.593    | 2.593     | 3.212                   | 2.740    | 2.729     |
| B8  | Size         | 19448                  | 2268     | 3286      | 50804                   | 411      | 801       |
|     | Mean         | 0.393                  | 0.544    | 0.570     | 0.052                   | 0.182    | 0.031     |
|     | Std. Dev.    | 2.946                  | 2.652    | 2.566     | 3.212                   | 3.332    | 3.011     |

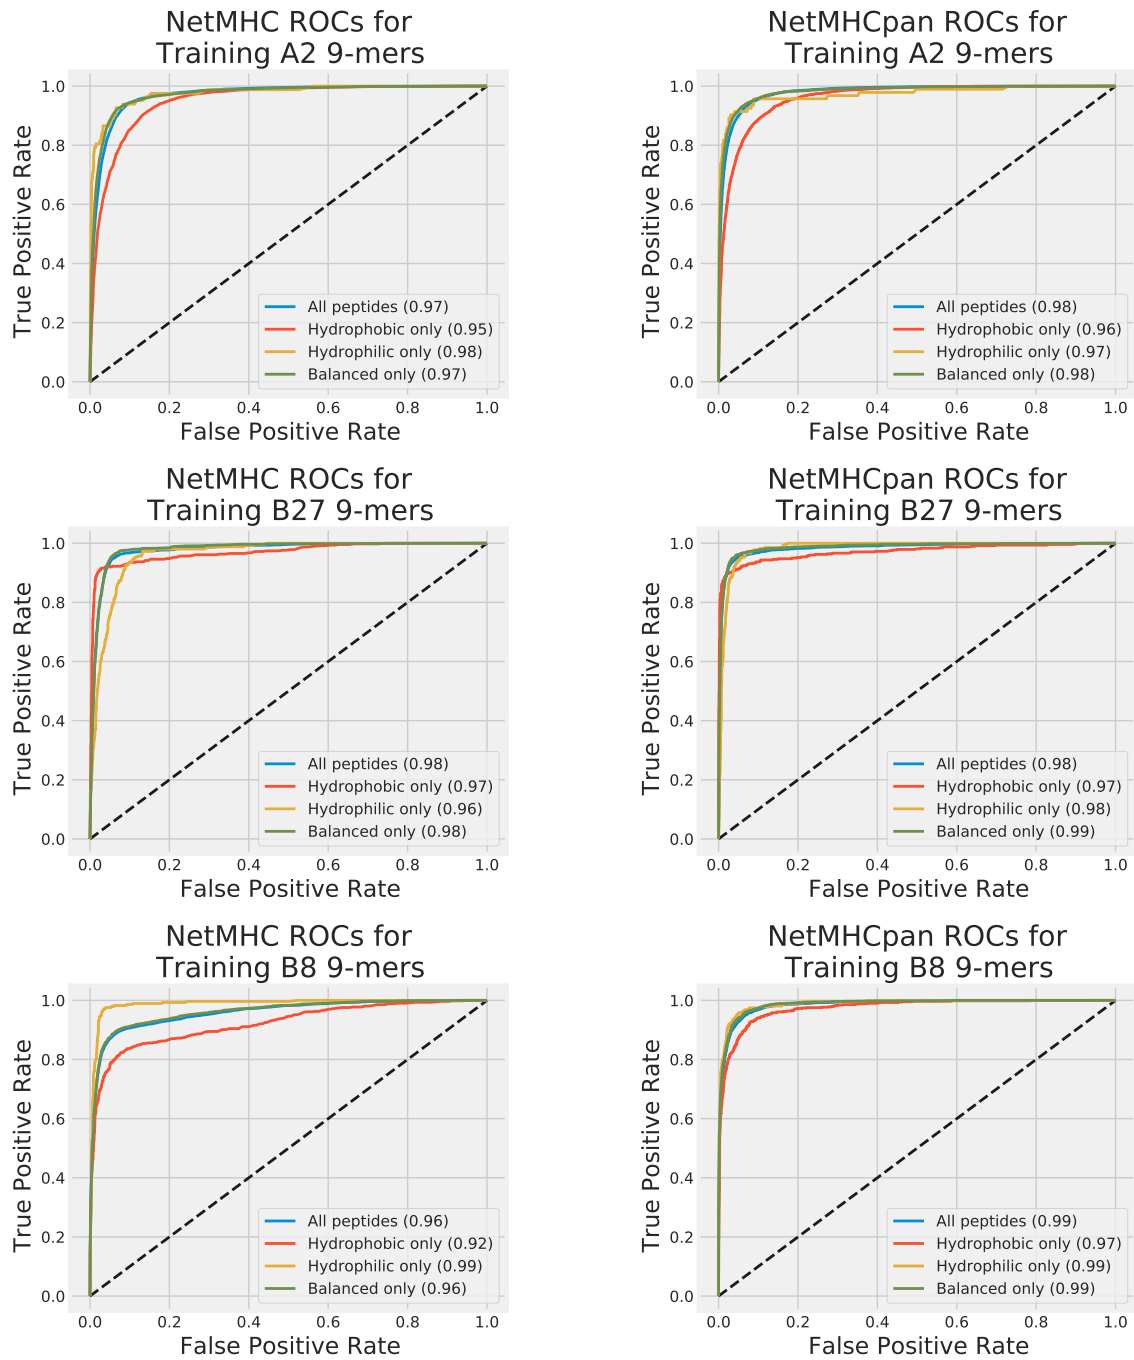

Figure S1.

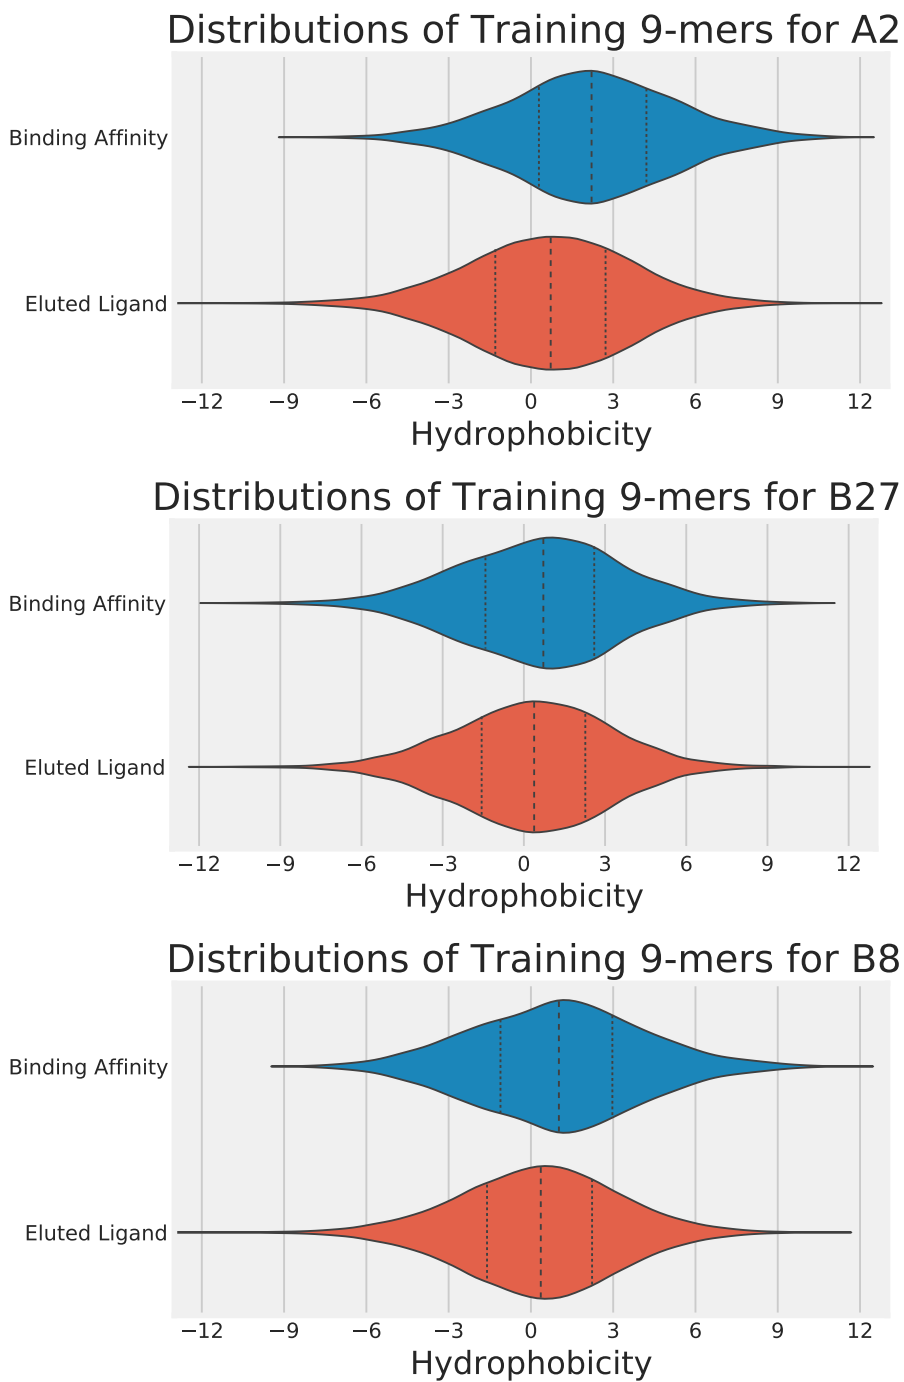

Figure S2.
